# Supplementary material
Source: Royal Society of Chemistry journal article supplement (doi:10.1039/d5cy01554e)
Supplement: d5cy01554e1.pdf [file d5cy01554e1.pdf]

**Electronic Supplementary Information**

**Boosting the chemoselective production of biomass-derived  
butanediol by bifunctional Pd-WO<sub>x</sub> catalysts modified with  
MgO<sub>y</sub> species**

Heng Huang<sup>ab</sup>, Haijie Yu<sup>ab</sup>, Jiayi Peng<sup>b</sup>, Yueyue Tang<sup>b</sup>, Renhui Ling<sup>b</sup>, Jianjian Wang<sup>ab\*</sup>

<sup>a</sup> School of Chemistry and Chemical Engineering, Institute of Advanced Interdisciplinary Studies, Multi-scale Porous Materials Center, Chongqing University, Chongqing, 401331, China.

<sup>b</sup> State Key Laboratory of Coal Mine Disaster Dynamics and Control, Chongqing University, Chongqing, 401331, China.

\* Corresponding author: wangjianjian@cqu.edu.cn.

## Experimental Section

### Materials

PdCl<sub>2</sub> (99%), WCl<sub>6</sub> (99%), ethylene glycol (EG, 98%), 1,2-propanediol (1,2-PDO, 99%), 1,3-propanediol (1,3-PDO, 98%), 1,2-butanediol (1,2-BDO, >98%), 1,4-butanediol (1,4-BDO, 99%), glucose (99%), pyridine (>99%), Mg(NO<sub>3</sub>)<sub>2</sub>·6H<sub>2</sub>O (AR, 99%), Zr(NO<sub>3</sub>)<sub>4</sub>·5H<sub>2</sub>O (AR,99%), Al<sub>2</sub>(NO<sub>3</sub>)<sub>3</sub>·9H<sub>2</sub>O (AR,99%), and Cr<sub>2</sub>(NO<sub>3</sub>)<sub>3</sub>·9H<sub>2</sub>O were purchased from Aladdin Company. Ethanol (>99%) was purchased from KESHI Company. All chemicals were directly used without further purification.

### Characterization

Powder X-ray diffraction (XRD) pattern was recorded on a PANalytical apparatus with a Cu K $\alpha$  radiation ( $\lambda = 0.1542$  nm) in the range of 5-80° at a speed of 5° min<sup>-1</sup>. Fourier transform infrared spectroscopy (FTIR) was performed on a NICOLET iS50 instrument. Thermogravimetric analysis (TGA) was conducted on a TGA2 from Mettler Toledo Company in the air of catalysts, measuring temperature from 30 °C to 800 °C. Inductively coupled plasma optical emission spectrometer (ICP-OES) was performed on VARIAN 710-ES. Solid samples were dissolved in nitric acid and diluted before measurement. Nitrogen adsorption and desorption isotherms of the samples were measured at 77 K with a BELSORP MAX apparatus from MicrotracBEL company. BET surface areas were calculated using the desorption isotherms. All samples were outgassed at 160 °C for 12 h before measurement. Hydrogen temperature-programmed reduction (H<sub>2</sub>-TPR) and hydrogen temperature-

programmed ( $\text{H}_2$ -TPD) desorption were performed on a MICROTRAC BELCAT apparatus. Approximately 50 mg of each sample was placed in quartz reactors and reduced in a stream of  $50 \text{ mL min}^{-1}$  10%  $\text{H}_2/\text{Ar}$  at a heating rate of  $10 \text{ }^\circ\text{C min}^{-1}$ .  $\text{NH}_3$  temperature-programmed desorption with both thermal conductivity detector (TCD) and mass spectrometer (MS) detectors was performed on a BSD-C200 apparatus. About 100 mg of the sample was pretreated in a He atmosphere at  $300 \text{ }^\circ\text{C}$  for 1 h; after subsequent cooling to  $50 \text{ }^\circ\text{C}$ , 10%  $\text{NH}_3/\text{He}$  mixture flowing gas ( $30\text{--}50 \text{ mL min}^{-1}$ ) was introduced for 1 h until adsorption saturation. The tube was purged with a pure He flow for 1 h to remove the weak physical adsorption of  $\text{NH}_3$  on the surface. The sample was desorbed and heated to  $800 \text{ }^\circ\text{C}$  at a rate of  $10 \text{ }^\circ\text{C min}^{-1}$  in a He atmosphere with a record of TCD. X-Ray Photoelectron Spectroscopy (XPS) was conducted on a Thermo Scientific K-Alpha. The binding energy values (B.E.) were estimated after positioning the C 1s peak of the contaminant carbon at  $284.8 \text{ eV}$ . Transmission electron microscopy (TEM) and energy-dispersive X-ray spectroscopy (EDS) mapping were conducted on a FEI Talos 200S with an operating voltage of 200 kV. In situ diffuse reflectance infrared Fourier transform spectroscopy (DRIFTS) was conducted on a SHIMADZU IRTracer-100 equipped with a MCT detector. The sample amount loaded in the DRIFTS cell (HARRICK) was around 50 mg and the gas flow rate was kept at  $20 \text{ mL/min}$ . Using a blank catalyst as the background, maintain the sample at different test temperatures for 0.5 hours and collect infrared spectra.

## Catalytic evaluation

Typically, experiment for catalytic conversion of biomass was performed in a 25 mL autoclavable reactor. Each experiment was repeated at least twice. Typically, 100 mg of substrate, 50 mg of catalyst and 10 mL of H<sub>2</sub>O were added to the reactor. Then, the sealed reactor was filled with hydrogen several times to remove air, and finally kept with 0.6 MPa of H<sub>2</sub>. After that, the reactor was heated up to set temperature, and kept string at 500 r/min. After completion of the reaction, the solid part was collected by centrifugation. The upper clear solution was passed through 0.22 um pore-size filter, and then analyzed by high performance liquid chromatography (HPLC) equipped with an Aminex HPX-87H<sup>®</sup> column (300 \* 7.8 mm) and operated at 55 °C. The mobile phase was 0.5 M H<sub>2</sub>SO<sub>4</sub> with a flow rate of 0.5 mL/min. The quantification of substrate conversion as well as product yield was calculated based on the external standard method, and the value of correlation coefficient (R<sup>2</sup>) was above 0.999.

Glucose conversion and product yield were calculated by the following equations:

$$\text{Glucose conversion (\%)} = \frac{\text{mole of converted glucose}}{\text{mole of initial glucose}} \times 100\%$$

$$\text{Yield of product (\%)} = \frac{\text{mole of generated product}}{\text{mole of initial glucose}} \times 100\%$$

If lignocellulosic biomass was used as the substrate, its conversion was not measured, and the yield of product was calculated based on the following equation:

$$\begin{aligned} \text{Yield of product (\%)} \\ = \frac{\text{mole of generated product}}{\text{mole of glucose unit in initial lignocellulosic biomass}} \times 100\% \end{aligned}$$

Some other by-products including sorbitol, EG, PDO, lactic acid, and furan-

contained compounds were not individually quantified, and no gaseous product was generated by GC analysis.

**Table S1** Textual properties of various samples (M = Mg, Zr, Al, Cr).

|   |                                      | SA <sup>a</sup>                   | TPV <sup>b</sup>                   | Pd <sup>c</sup> | Pd/W <sup>c</sup> | M/W <sup>c</sup> | Acidity <sup>d</sup>    |
|---|--------------------------------------|-----------------------------------|------------------------------------|-----------------|-------------------|------------------|-------------------------|
|   | Sample                               | (m <sup>2</sup> g <sup>-1</sup> ) | (cm <sup>3</sup> g <sup>-1</sup> ) | (wt%)           | (mol/mol)         | (mol/mol)        | (mmol g <sup>-1</sup> ) |
| 1 | Pd-WO <sub>x</sub> -MgO <sub>y</sub> | 57                                | 0.14                               | 2.3             | 0.05              | 0.12             | 1.5                     |
| 2 | Pd-WO <sub>x</sub> -ZrO <sub>y</sub> | 265                               | 0.17                               | 1.7             | 0.05              | 0.53             | 1.4                     |
| 3 | Pd-WO <sub>x</sub> -AlO <sub>y</sub> | 325                               | 0.26                               | 1.7             | 0.04              | 0.50             | 2.3                     |
| 4 | Pd-WO <sub>x</sub> -CrO <sub>y</sub> | 186                               | 0.11                               | 1.8             | 0.05              | 0.48             | 2.5                     |

<sup>a</sup> Surface area (SA) calculated in the relative pressure range of 0.001-0.1. <sup>b</sup> Total pore volume (TPV) at P/P<sub>0</sub>=0.95. <sup>c</sup> Measured by ICP-OES. <sup>d</sup> Acidity of the prepared samples measured from NH<sub>3</sub>-TPD analysis.

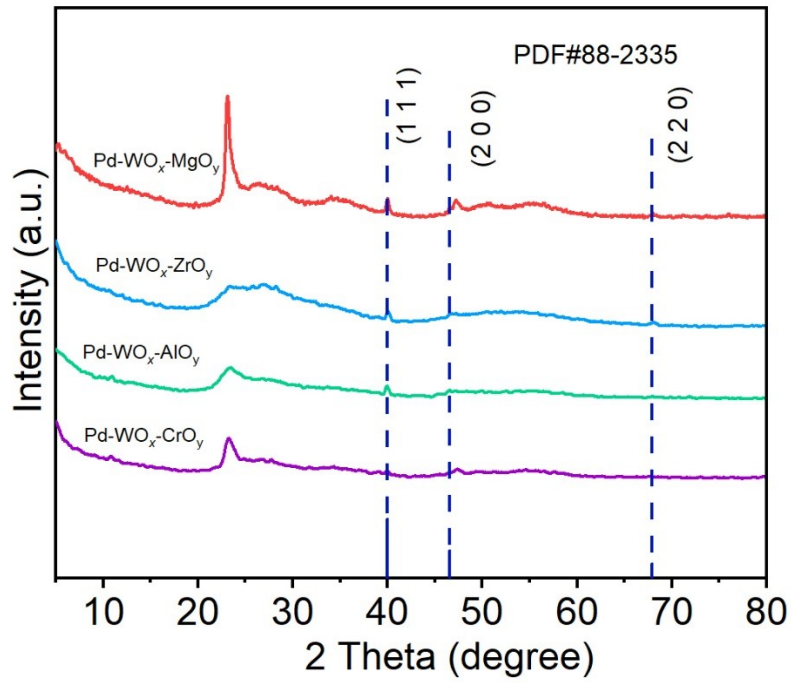

**Fig. S1** XRD patterns of Pd-WO<sub>x</sub>-MO<sub>y</sub> (M = Mg, Zr, Al, Cr) compared to the Pd standard PDF cards.

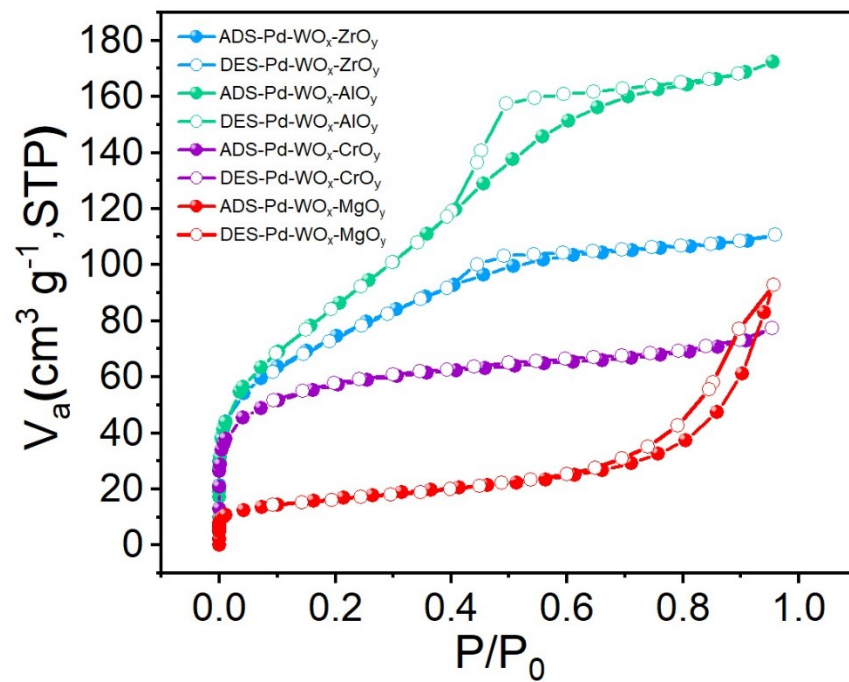

**Fig. S2**  $N_2$  adsorption-desorption isotherms of  $Pd-WO_x-MO_y$  ( $M = Mg, Zr, Al, Cr$ ).

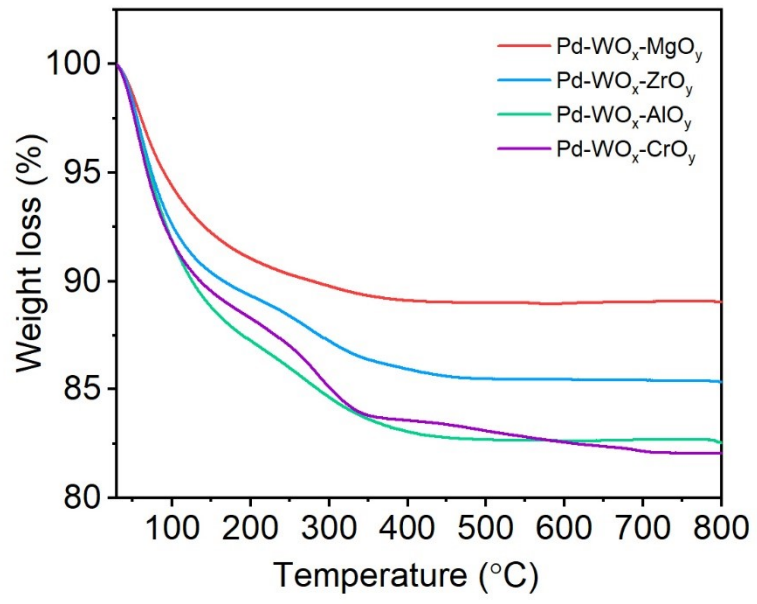

**Fig. S3** TG curves of various sample.

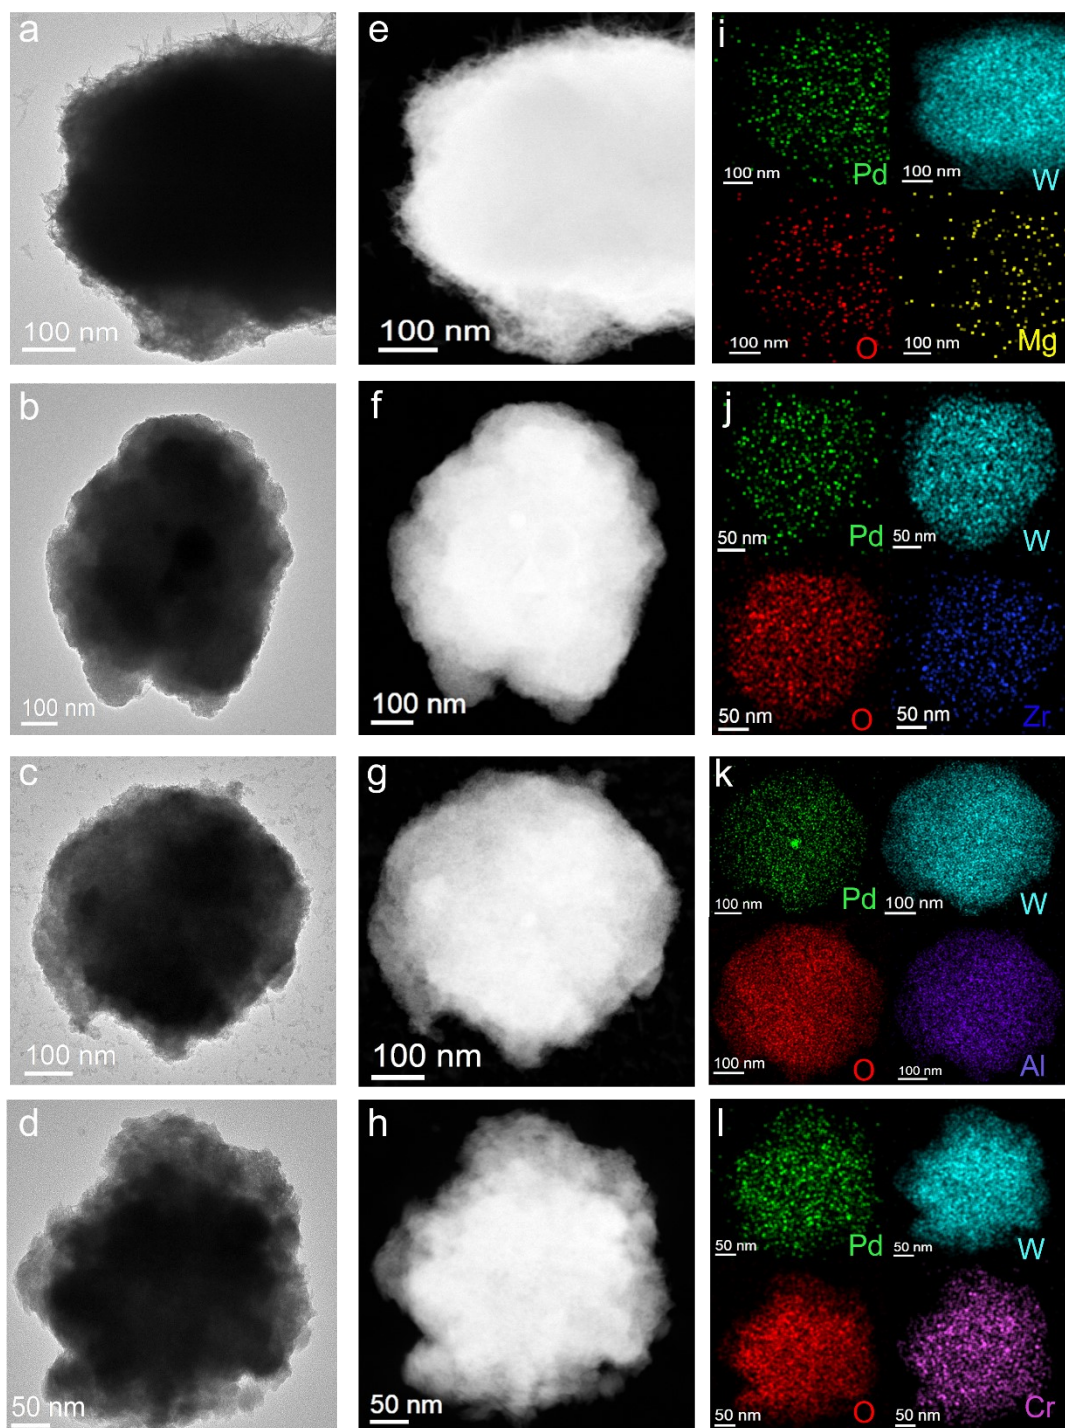

**Fig. S4** TEM images (a-d), HAADF images (e-h), and EDS elemental mappings (i-l) of the corresponding Pd-WO<sub>x</sub>-MgO<sub>y</sub>, Pd-WO<sub>x</sub>-ZrO<sub>y</sub>, Pd-WO<sub>x</sub>-AlO<sub>y</sub>, and Pd-WO<sub>x</sub>-CrO<sub>y</sub>.

**Table S2** The analytic results of O 1s XPS for Pd-WO<sub>x</sub>-MO<sub>y</sub>.<sup>a</sup>

| Sample                               | Lattice oxygen (O <sub>lat</sub> ) | Defective oxygen (O <sub>def</sub> ) | Adsorbed oxygen (O <sub>ads</sub> ) |
|--------------------------------------|------------------------------------|--------------------------------------|-------------------------------------|
| Pd-WO <sub>x</sub> -MgO <sub>y</sub> | 530.2                              | 531.2                                | 532.8                               |
|                                      | 23.1%                              | 60.4%                                | 16.5%                               |
| Pd-WO <sub>x</sub> -ZrO <sub>y</sub> | 530.7                              | 531.5                                | 532.4                               |
|                                      | 49.9%                              | 34.9%                                | 15.2%                               |
| Pd-WO <sub>x</sub> -AlO <sub>y</sub> | 530.6                              | 531.4                                | 532.4                               |
|                                      | 23.1%                              | 20.3%                                | 56.6%                               |
| Pd-WO <sub>x</sub> -CrO <sub>y</sub> | 530.1                              | 531.1                                | 532.2                               |
|                                      | 21.2%                              | 41.5%                                | 37.3%                               |

<sup>a</sup> Calculated based on its corresponding percentage in the deconvoluted XPS spectrum.

**Table S3** The W 4f XPS analytic results of these four samples.<sup>a</sup>

| Sample                               | W <sup>6+</sup> (W 4f <sub>5/2</sub> ) | W <sup>6+</sup> (W 4f <sub>7/2</sub> ) | W <sup>5+</sup> (W 4f <sub>5/2</sub> ) | W <sup>5+</sup> (W 4f <sub>7/2</sub> ) | W (4f <sub>3/2</sub> ) | W <sup>5+</sup> /W <sup>6+</sup> |
|--------------------------------------|----------------------------------------|----------------------------------------|----------------------------------------|----------------------------------------|------------------------|----------------------------------|
| Pd-WO <sub>x</sub> -MgO <sub>y</sub> | 29.2%                                  | 26.6%                                  | 25.6%                                  | 13.4%                                  | 5.5%                   | 0.70                             |
| Pd-WO <sub>x</sub> -ZrO <sub>y</sub> | 28.0%                                  | 51.5%                                  | 8.1%                                   | 8.9%                                   | 3.5%                   | 0.21                             |
| Pd-WO <sub>x</sub> -AlO <sub>y</sub> | 37.8%                                  | 33.0%                                  | 9.5%                                   | 17.4%                                  | 2.5%                   | 0.38                             |
| Pd-WO <sub>x</sub> -CrO <sub>y</sub> | 30.5%                                  | 38.4%                                  | 12.2%                                  | 15.8%                                  | 3.1%                   | 0.41                             |

<sup>a</sup> Calculated based on its corresponding percentage in the deconvoluted XPS spectrum.

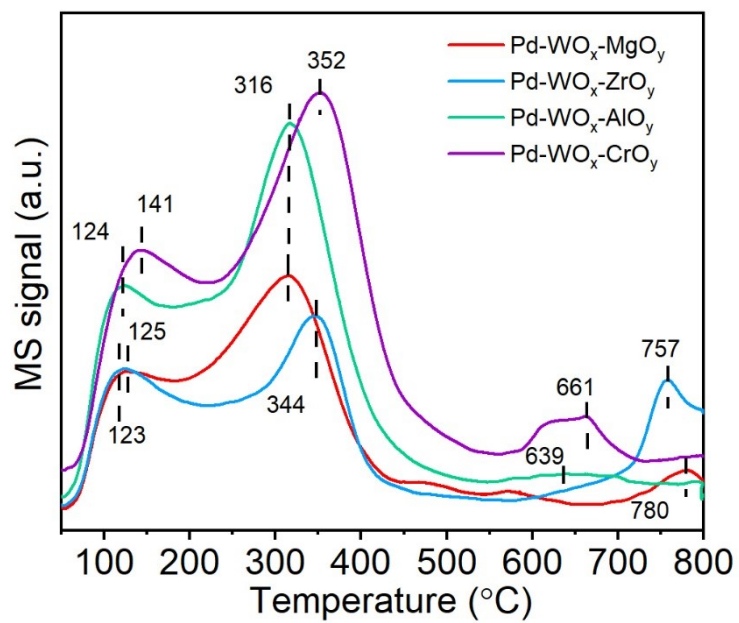

**Fig. S5** NH<sub>3</sub>-TPD curves of Pd-WO<sub>x</sub>-MgO<sub>y</sub>, Pd-WO<sub>x</sub>-ZrO<sub>y</sub>, Pd-WO<sub>x</sub>-AlO<sub>y</sub>, and Pd-WO<sub>x</sub>-CrO<sub>y</sub>.

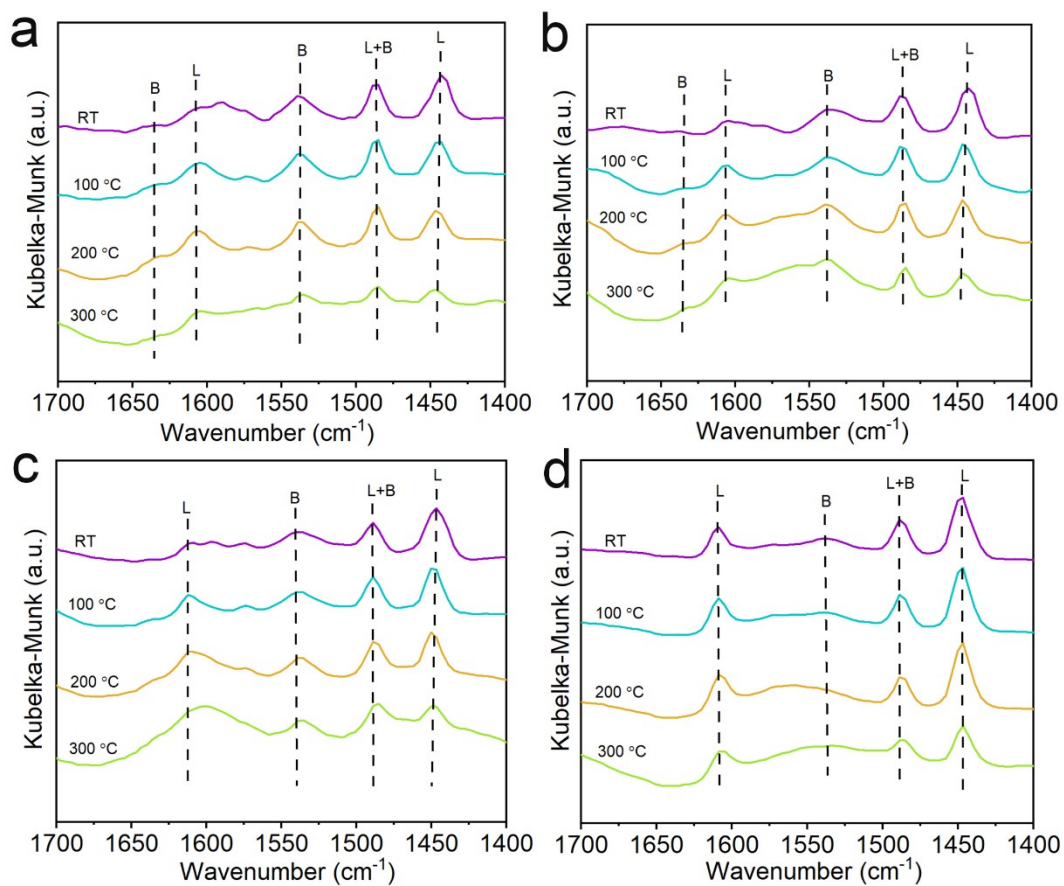

**Fig. S6** Pyridine-adsorbed DRIFTS spectra of (a) Pd-WO<sub>x</sub>-MgO<sub>y</sub>, (b) Pd-WO<sub>x</sub>-ZrO<sub>y</sub>, (c) Pd-WO<sub>x</sub>-AlO<sub>y</sub>, and (d) Pd-WO<sub>x</sub>-CrO<sub>y</sub>. RT, L, and B represented room temperature, Lewis acid sites, and Brønsted acid sites, respectively.

**Table S4** Quantitative analysis of acid sites from pyridine-adsorped DRIFTS performed at 100 °C.

| Sample                               | Acid type |     |      |
|--------------------------------------|-----------|-----|------|
|                                      | L         | B   | B/L  |
| Pd-WO <sub>x</sub> -MgO <sub>y</sub> | 5.8       | 6.0 | 1.03 |
| Pd-WO <sub>x</sub> -ZrO <sub>y</sub> | 3.4       | 2.4 | 0.70 |
| Pd-WO <sub>x</sub> -AlO <sub>y</sub> | 2.6       | 1.9 | 0.73 |
| Pd-WO <sub>x</sub> -CrO <sub>y</sub> | 5.3       | 2.1 | 0.39 |

**Table S5** Comparison of various catalysts for the conversion of glucose to BDO.

| Catalyst                                   | T                 | t                | H <sub>2</sub> | Conv. | Yield (%) |         | Reference |
|--------------------------------------------|-------------------|------------------|----------------|-------|-----------|---------|-----------|
|                                            | (°C) <sup>a</sup> | (h) <sup>b</sup> | (MPa)          | (%)   | 1,2-BDO   | 1,4-BDO |           |
| Pd-WO <sub>x</sub> -MgO <sub>y</sub>       | 160               | 4                | 0.6            | >99   | 47.6      | 8.6     | This work |
| 10%Ce8%Cu/γ-Al <sub>2</sub> O <sub>3</sub> | 200               | 6                | 4              | 100   | 10.2      | \       | [1]       |
| Ni-Cu/4ZnO-CNT                             | 245               | 6                | 5              | 100   | 6         | \       | [2]       |
| Pt/SiO <sub>2</sub> @Mg(OH) <sub>2</sub>   | 180               | 4                | 6              | >99   | 5         | \       | [3]       |
| Ni-W/M                                     | 245               | 2                | 4              | >99   | <5        | \       | [4]       |

<sup>a</sup> T was short for reaction temperature. <sup>b</sup> t was short for reaction time.

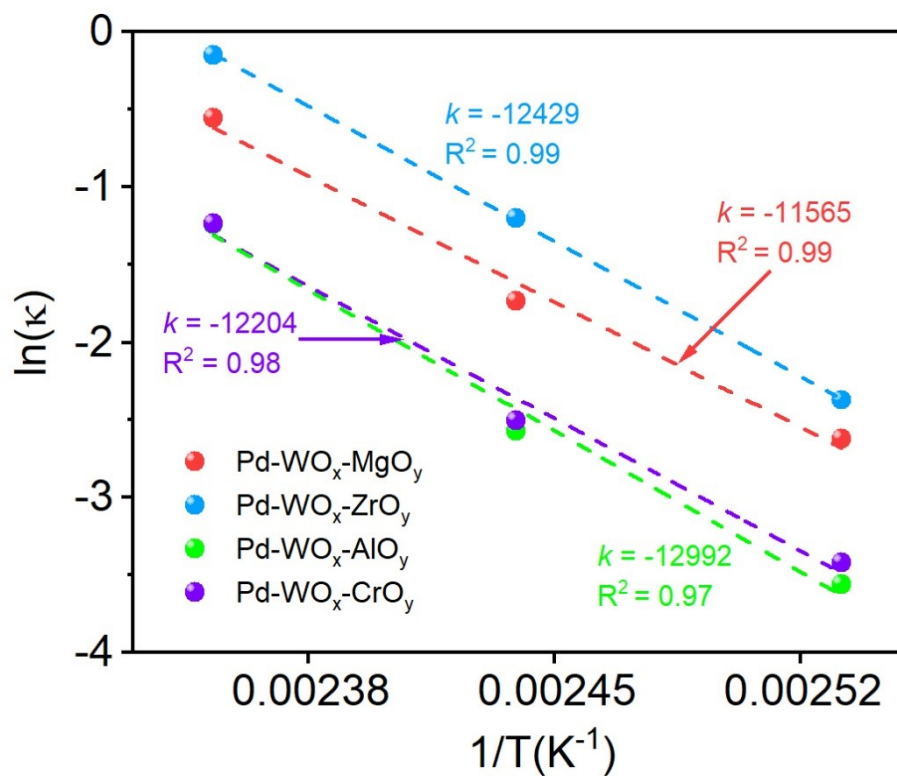

**Fig. S7** The correlation between  $\ln k$  and  $1/T$  obtained from the kinetic analysis of (a) Pd- $WO_x$ -MgO $_y$ , (b) Pd- $WO_x$ -ZrO $_y$ , (c) Pd- $WO_x$ -AlO $_y$ , and (d) Pd- $WO_x$ -CrO $_y$ .

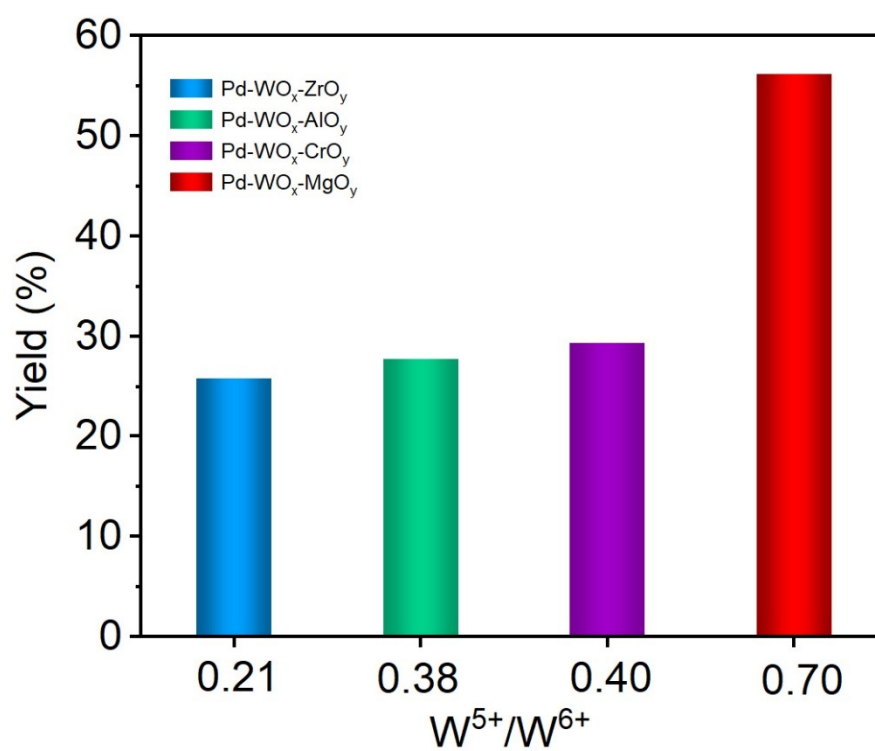

**Fig. S8** Correlation between  $W^{5+}/W^{6+}$  ratio and BDO yield.

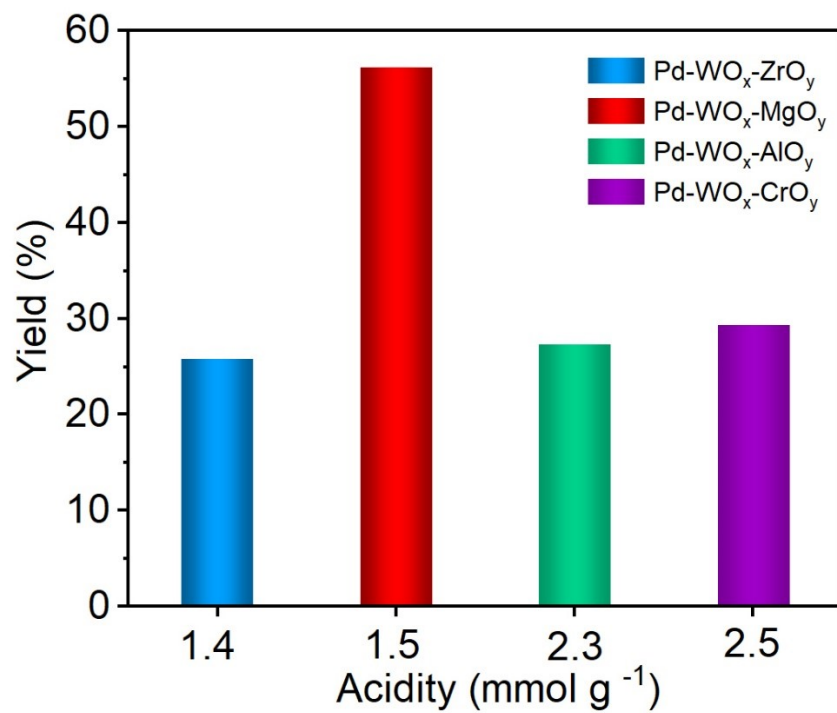

**Fig. S9** Correlation between acidity and BDO yield.

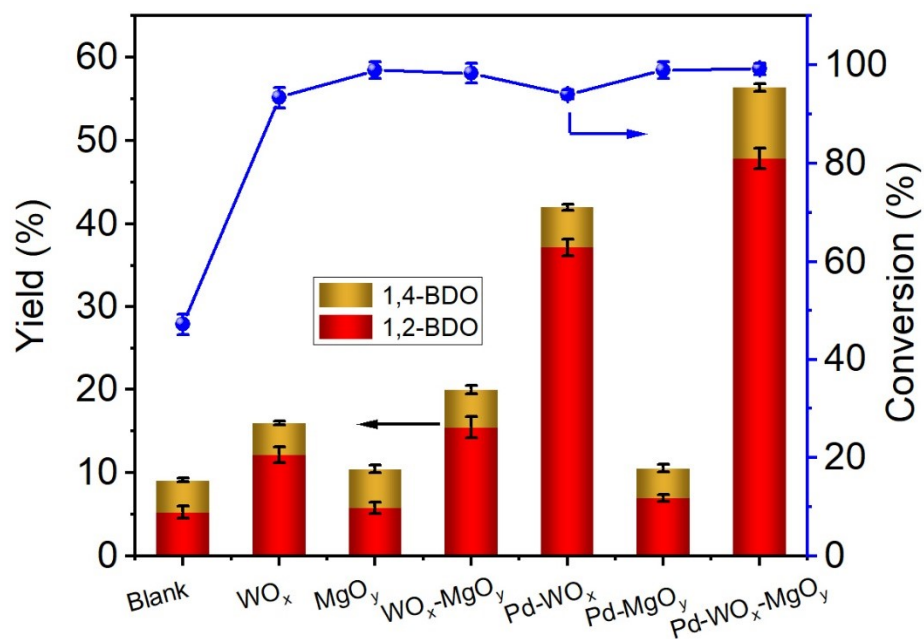

**Fig. S10** Catalytic conversion of glucose to BDO over different catalysts. Reaction conditions: 100 mg of glucose, 10 mL of water, 160 °C, 4 h, 0.6 MPa of H<sub>2</sub>.

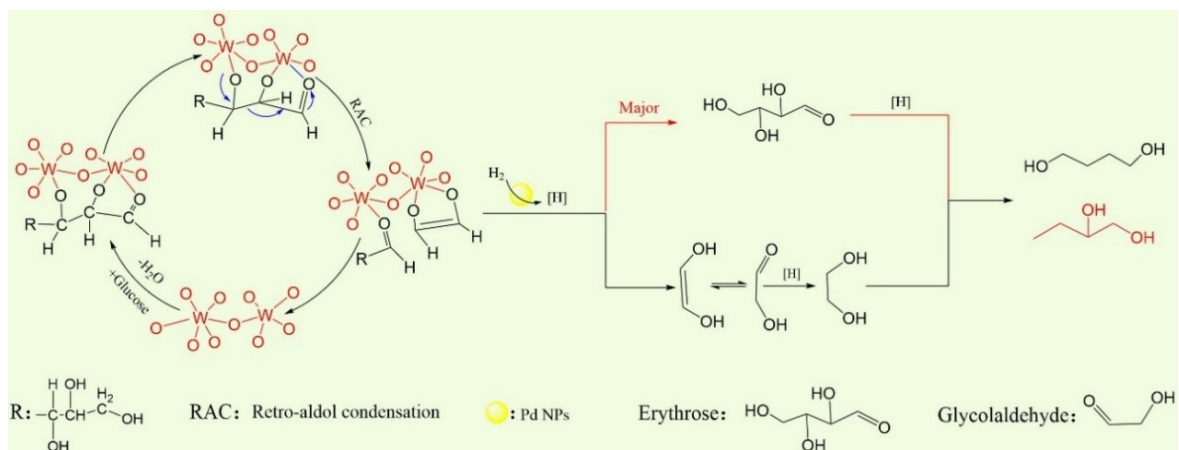

**Fig. S11** Proposed reaction pathway for glucose conversion to BDO over Pd-WO<sub>x</sub>-

MgO<sub>y</sub>.

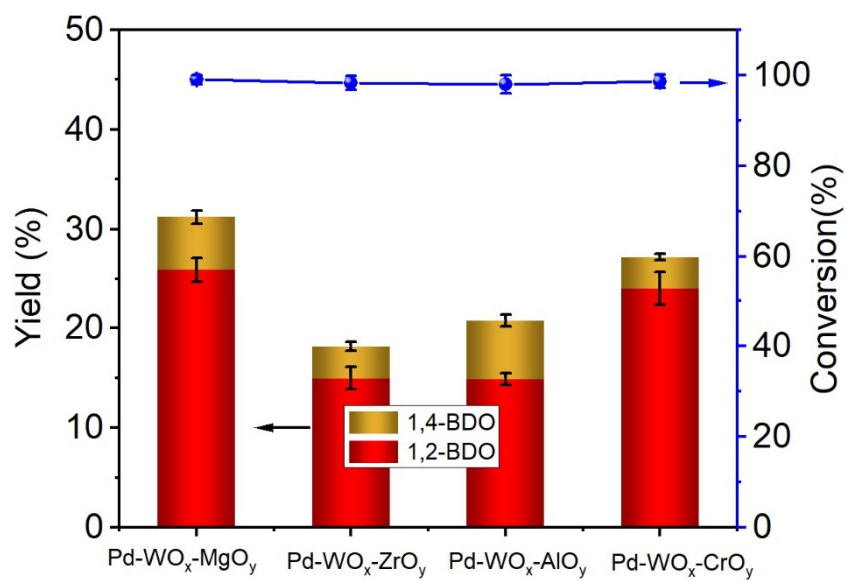

**Fig. S12** Catalytic conversion of erythrose to BDO over Pd-WO<sub>x</sub>-MO<sub>y</sub> (M = Mg, Zr, Al, Cr). Reaction conditions: 100 mg of substrate, 10 mL of water, 160 °C, 4 h, 0.6 MPa of H<sub>2</sub>.

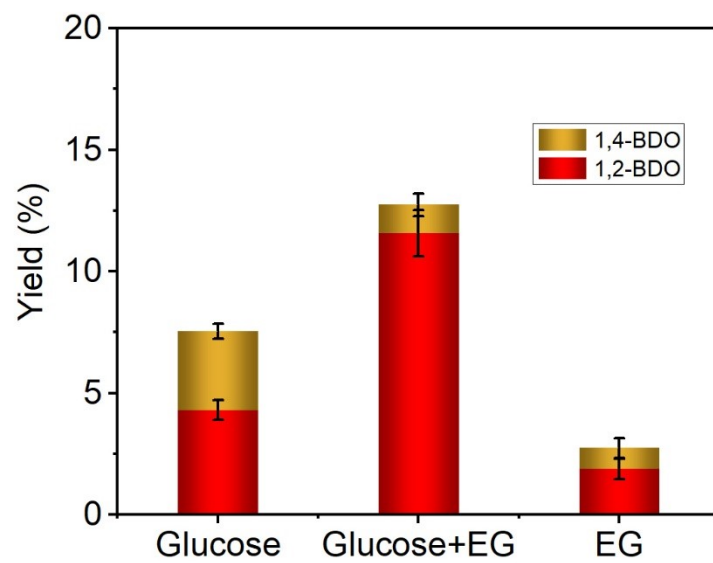

**Fig. S13** Catalytic conversion of glucose and EG to BDO over Pd-WO<sub>x</sub>-MgO<sub>y</sub>.

Reaction conditions: 100 mg of substrate, 10 mL of water, 160 °C, 4 h, 0.6 MPa N<sub>2</sub>.

Note: (Glucose+EG) represented 100 mg of glucose with extra 2 mL of EG.

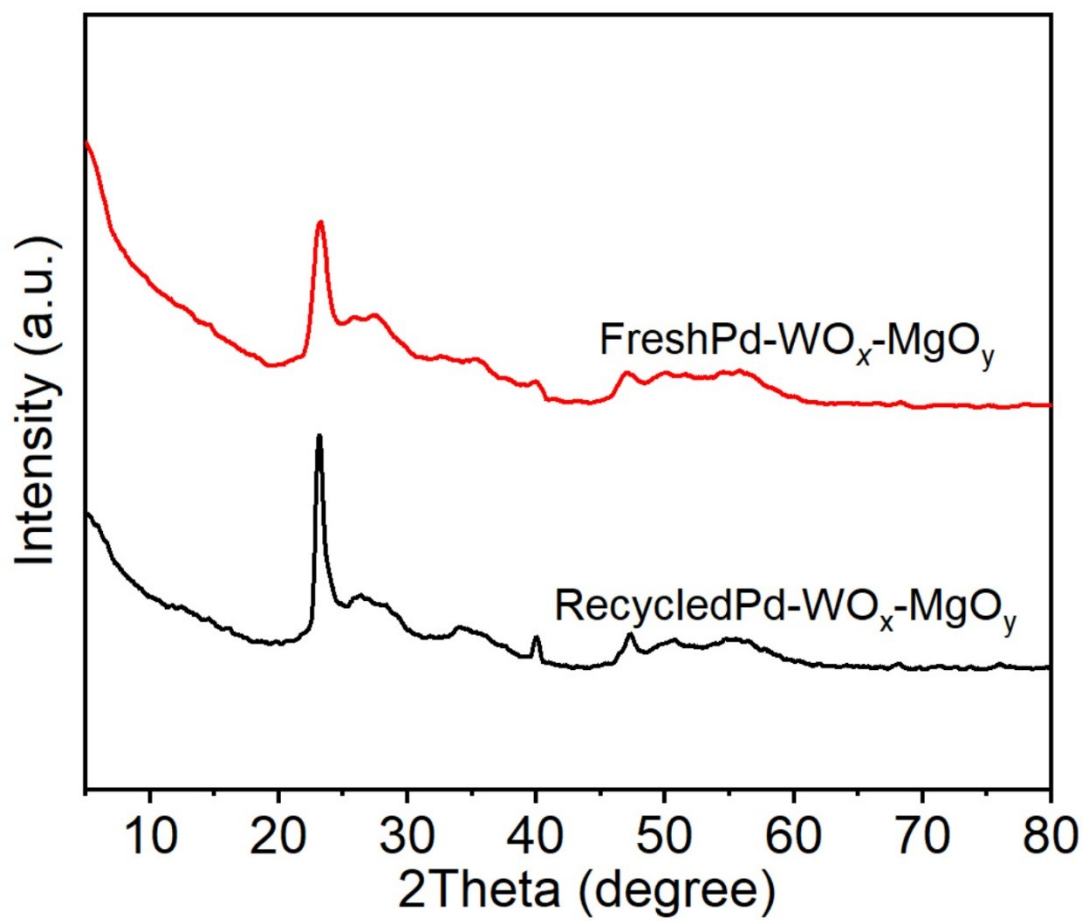

**Fig. S14** XRD patterns of fresh and recycled Pd-WO<sub>x</sub>-MgO<sub>y</sub>.

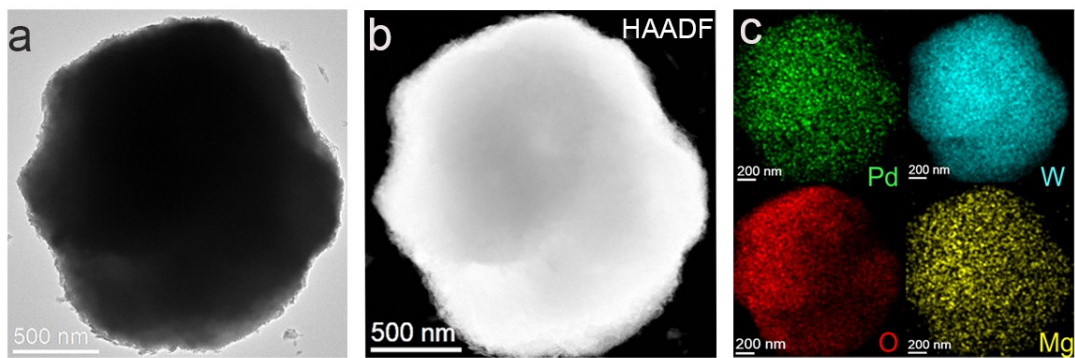

**Fig. S15** (a) TEM image, (b) HAADF image, and (c) the mapping diagrams of the recycled Pd-WO<sub>x</sub>-MgO<sub>y</sub>.

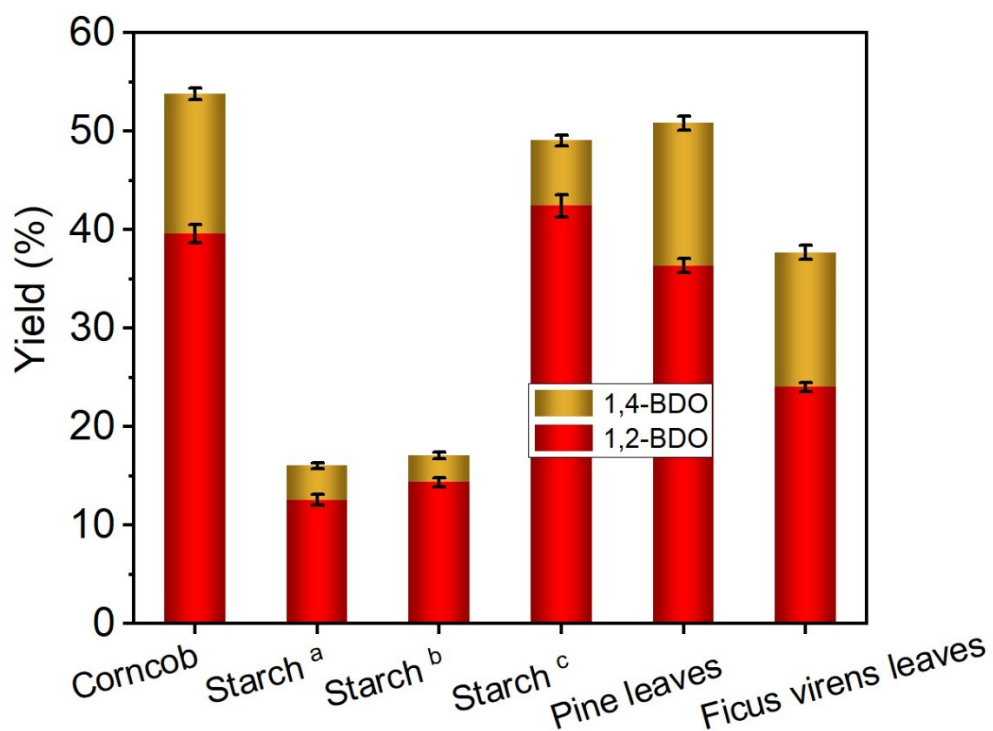

**Fig. S16** Catalytic conversion of other substrates over Pd-WO<sub>x</sub>-MgO<sub>y</sub>.

**Note:** <sup>a</sup> Reaction conditions: 100 mg of substrate, 50 mg catalyst, 10 mL of water, 160 °C, 4 h, 0.6 MPa of H<sub>2</sub>; <sup>b</sup> 100 mg of substrate, 100 mg catalyst, 10 mL of water, 160 °C, 4 h, 0.6 MPa of H<sub>2</sub>; <sup>c</sup> 100 mg of substrate, 50 mg catalyst, 10 mL of water, 180 °C, 4 h, 0.6 MPa of H<sub>2</sub>. The content of cellulose in Corncob, Pine leaves and Ficus virens leaves was 40 %, 25 % and 29 %, respectively.

## References

- [1] BALACHANDRAN KIRALI A A, SREEKANTAN S, MARIMUTHU B. Ce promoted Cu/ $\gamma$ -Al<sub>2</sub>O<sub>3</sub> catalysts for the enhanced selectivity of 1,2-propanediol from catalytic hydrogenolysis of glucose [J]. *Catalysis Communications*, 2022, 165:106447.
- [2] MA H, VAN DER WIJST C, MORKEN S F, et al. Directing the reaction pathway in the one-pot conversion of cellulose to vicinal diols by controlling bimetallic active sites in Ni-Cu/4ZnO-CNT catalysts [J]. *Catalysis Today*, 2024, 435:114709.
- [3] GU M, SHEN Z, ZHANG W, et al. Hydrogenolysis of Glucose into Propylene Glycol over Pt/SiO<sub>2</sub>@Mg(OH)<sub>2</sub> Catalyst [J]. *ChemCatChem*, 2020, 12(13): 3447-3452.
- [4] LI N, LIU X, ZHOU J, et al. Enhanced Ni/W/Ti Catalyst Stability from Ti–O–W Linkage for Effective Conversion of Cellulose into Ethylene Glycol [J]. *ACS Sustainable Chemistry & Engineering*, 2020, 8(26): 9650-9659.
